# Supplementary material
Source: publisher figshare collection journal article supplement (https://gsajournals.figshare.com/ndownloader/files/14331785)
Supplement: Supplementary file 1 [file 14331785]

## Sheet: Sheet1
Supplementary file S6. Detailed information related to the identified modules in integrated network.
Module	Size	Density	Internal weight	External weight	P-value	Members
1 (Purple)	10	1	45	17	2.38e-05	ADCY1 TAS2R40 CHRM2 CNR1 C5 RXFP3 HTR1E GRM6 GRM7 SSTR1
2 (Orange)	12	0.5455	36	29	0.000936374	FOXA2 SOX2 SIX3 ISL1 FGF8 DBX1 NKX2-2 LHX3 FEV LHX2 DLX1 FOXG1
3 (Blue)	9	0.6667	24	21	0.0175646	UTS2R CCKAR F2 GRM1 F2RL3 TRHR TSHR lincRNA.5232 CCK
4	10	0.6	27	35	0.019564	ZFP42 FOXA2 SOX2 SIX3 ISL1 FGF8 NKX2-2 LHX2 FOXG1 ESRRB
